# Supplementary material
Source: PubMed Central journal article supplement (PMC6121925)
Supplement: 10.1194_P084970_jlr.P084970-1.pdf [file 10.1194_P084970_jlr.P084970-1.pdf]

## Supplemental Tables

Supplemental Table S1: Comparison of GEE model fitness for variable selection using quasi-likelihood information criteria.

| Model              | QIC     | Delta |
|--------------------|---------|-------|
| <b>log(ISI)</b>    |         |       |
| M7                 | -1610.5 | 0.0   |
| M8                 | -1608.9 | 1.6   |
| M9                 | -1607.9 | 2.6   |
| M5                 | -1604.1 | 6.4   |
| M6                 | -1602.4 | 8.1   |
| M4                 | -1599.2 | 11.3  |
| M3                 | -1575.6 | 34.8  |
| M1                 | -1229.7 | 380.8 |
| M0                 | -1228.2 | 382.3 |
| M2                 | -1219.2 | 391.3 |
| <b>log(ISSI-2)</b> |         |       |
| M8                 | -2476.2 | 0.0   |
| M9                 | -2474.3 | 1.9   |
| M6                 | -2471.3 | 4.9   |
| M7                 | -2467.4 | 8.9   |
| M4                 | -2458.8 | 17.4  |
| M5                 | -2456.5 | 19.7  |
| M3                 | -2450.5 | 25.7  |
| M2                 | -2226.5 | 249.7 |
| M0                 | -2171.0 | 305.2 |
| M1                 | -2168.5 | 307.8 |

Given the number of possible combinations of outcome and predictor variables, only ISI and ISSI-2 with total TGFA (nmol/mL) were used to compare various GEE models and to select a final model. Baseline age was used as including both the original age and the time variable would result in collinearity. Column names: QIC is the quasi-likelihood information criteria (smaller values, eg. larger negative values, indicate a better fit compared to other models), Delta is the QIC minus the lowest QIC (models with delta <10 are considered equivalent). Models were:

- M0: log(ISSI-2) or log(ISI) = total TGFA (nmol/mL) + years from baseline
- M1: M0 + fatty acid by time interaction
- M2: M0 + sex + ethnicity + baseline age
- M3: M2 + WC
- M4: M3 + ALT
- M5: M4 + physical activity (MET)
- M6: M5 + total NEFA
- M7: M6 + alcohol intake
- M8: M7 + family history of diabetes
- M9: M8 + smoking status

Supplemental Table S2: Concentration (nmol/mL) and relative percent (mol%) values of TGFA in PROMISE participants at the baseline visit (2004-2006).

| <b>TGFA</b> | <b>Concentrations (nmol/mL)</b> | <b>Proportion (mol%)</b> |
|-------------|---------------------------------|--------------------------|
| 18:3 n-3    | 45.2 (31.1)                     | 1.5 (0.6)                |
| 20:5 n-3    | 9.9 (8.1)                       | 0.4 (0.4)                |
| 22:5 n-3    | 8.3 (5.7)                       | 0.3 (0.2)                |
| 22:6 n-3    | 16.7 (14.5)                     | 0.6 (0.6)                |
| 18:2 n-6    | 548.6 (298.7)                   | 18.0 (4.2)               |
| 18:3 n-6    | 15.1 (9.9)                      | 0.5 (0.2)                |
| 20:2 n-6    | 10.2 (4.7)                      | 0.4 (0.1)                |
| 20:3 n-6    | 10.2 (6.0)                      | 0.3 (0.1)                |
| 20:4 n-6    | 38.2 (19.1)                     | 1.3 (0.5)                |
| 22:4 n-6    | 4.6 (2.9)                       | 0.1 (0.1)                |
| 14:1 n-7    | 5.1 (6.1)                       | 0.1 (0.1)                |
| 16:1 n-7    | 126.1 (98.8)                    | 3.8 (1.3)                |
| 18:1 n-7    | 71.6 (34.8)                     | 2.4 (0.4)                |
| 18:1 n-9    | 1168.5 (592.2)                  | 37.8 (3.7)               |
| 20:1 n-9    | 8.5 (5.2)                       | 0.3 (0.2)                |
| 22:1 n-9    | 1.0 (0.6)                       | 0.0 (0.0)                |
| 24:1 n-9    | 2.2 (4.0)                       | 0.1 (0.1)                |
| 14:0        | 62.4 (59.0)                     | 1.8 (1.0)                |
| 16:0        | 868.0 (556.2)                   | 26.6 (4.4)               |
| 18:0        | 113.6 (63.4)                    | 3.7 (0.8)                |
| 20:0        | 1.9 (1.3)                       | 0.1 (0.0)                |
| 22:0        | 1.5 (1.2)                       | 0.1 (0.0)                |
| Total       | 3137.5 (1686.6)                 |                          |

Supplemental Table S3: Raw estimates and confidence interval values for *time*-adjusted GEE models of the association of the TGFA (mol% and nmol/mL) and total clinically-measured TG with insulin sensitivity and beta-cell function outcomes using the 6 year longitudinal data from the PROMISE cohort. Estimates represent a percent difference in the outcome per SD increase in the FA. P-values were adjusted for the BH false discovery rate, with an asterisk (\*) denoting a significant ( $p < 0.05$ ) association.

| <b>Fatty acid</b> | <b>log(HOMA2-%S)</b>  | <b>log(ISI)</b>       | <b>log(IGI/IR)</b>    | <b>log(ISSI-2)</b>   |
|-------------------|-----------------------|-----------------------|-----------------------|----------------------|
| <b>Totals</b>     |                       |                       |                       |                      |
| Clinical TAG      | -23.4 (-28.9, -17.6)* | -24.1 (-29.6, -18.1)* | -18.2 (-25.3, -10.3)* | -10.7 (-15.3, -6.0)* |
| Total             | -22.2 (-27.5, -16.5)* | -22.9 (-28.4, -17.0)* | -16.4 (-23.3, -9.0)*  | -9.8 (-14.1, -5.3)*  |
| <b>nmol/mL</b>    |                       |                       |                       |                      |
| 14:0              | -19.1 (-23.7, -14.2)* | -19.6 (-24.2, -14.6)* | -11.3 (-17.3, -4.9)*  | -6.9 (-10.5, -3.2)*  |
| 16:0              | -23.0 (-28.3, -17.4)* | -23.8 (-29.2, -18.0)* | -17.2 (-24.0, -9.8)*  | -10.2 (-14.5, -5.7)* |
| 18:0              | -20.8 (-26.3, -15.0)* | -21.3 (-27.1, -15.1)* | -15.7 (-22.5, -8.3)*  | -9.3 (-13.5, -4.9)*  |
| 20:0              | -12.6 (-16.6, -8.4)*  | -12.1 (-16.7, -7.2)*  | -7.7 (-13.3, -1.8)*   | -5.3 (-8.3, -2.2)*   |
| 22:0              | -12.1 (-16.4, -7.5)*  | -12.7 (-17.5, -7.8)*  | -2.2 (-8.2, 4.1)      | -1.8 (-4.8, 1.2)     |
| 18:1 n-9          | -21.4 (-26.0, -16.6)* | -22.0 (-26.8, -16.9)* | -16.7 (-23.1, -9.8)*  | -9.8 (-13.7, -5.7)*  |
| 20:1 n-9          | -14.9 (-19.0, -10.5)* | -14.2 (-18.9, -9.3)*  | -13.2 (-19.7, -6.1)*  | -7.2 (-10.9, -3.4)*  |
| 22:1 n-9          | -14.0 (-19.6, -8.0)*  | -12.3 (-18.5, -5.5)*  | -12.0 (-16.6, -7.0)*  | -6.3 (-9.0, -3.4)*   |
| 24:1 n-9          | -4.3 (-8.5, 0.1)      | -6.4 (-10.9, -1.6)*   | 3.5 (-2.5, 9.9)       | 1.8 (-1.3, 4.9)      |
| 14:1 n-7          | -14.9 (-19.5, -10.1)* | -15.2 (-19.9, -10.3)* | -9.4 (-15.1, -3.3)*   | -5.5 (-8.7, -2.2)*   |
| 16:1 n-7          | -19.2 (-24.3, -13.7)* | -19.9 (-25.2, -14.3)* | -15.0 (-21.9, -7.5)*  | -8.6 (-12.8, -4.2)*  |
| 18:1 n-7          | -22.2 (-26.0, -18.1)* | -23.0 (-27.1, -18.6)* | -17.0 (-22.7, -11.0)* | -9.9 (-13.2, -6.4)*  |
| 18:2 n-6          | -18.7 (-23.4, -13.7)* | -19.1 (-23.9, -14.0)* | -12.1 (-18.2, -5.6)*  | -7.5 (-11.3, -3.5)*  |
| 18:3 n-6          | -12.8 (-17.6, -7.7)*  | -12.5 (-17.6, -7.1)*  | -8.3 (-14.2, -2.0)*   | -5.0 (-8.5, -1.3)*   |
| 20:2 n-6          | -15.4 (-20.4, -10.1)* | -15.8 (-20.9, -10.3)* | -12.5 (-19.1, -5.3)*  | -6.8 (-10.9, -2.5)*  |
| 20:3 n-6          | -17.5 (-22.7, -12.0)* | -18.1 (-23.3, -12.6)* | -12.3 (-18.6, -5.4)*  | -7.4 (-11.4, -3.3)*  |
| 20:4 n-6          | -17.0 (-24.3, -9.0)*  | -17.8 (-25.3, -9.6)*  | -12.8 (-21.1, -3.6)*  | -7.5 (-12.8, -1.8)*  |
| 22:4 n-6          | -17.7 (-25.2, -9.5)*  | -18.2 (-25.9, -9.9)*  | -9.5 (-17.0, -1.3)*   | -5.6 (-10.3, -0.7)*  |
| 18:3 n-3          | -15.6 (-19.5, -11.6)* | -16.6 (-20.7, -12.3)* | -10.3 (-15.4, -4.8)*  | -6.3 (-9.2, -3.4)*   |
| 20:5 n-3          | -5.1 (-8.9, -1.1)*    | -7.8 (-11.7, -3.8)*   | -3.5 (-8.5, 1.7)      | -3.1 (-5.8, -0.2)*   |
| 22:5 n-3          | -7.2 (-11.3, -2.8)*   | -7.2 (-11.6, -2.6)*   | -10.1 (-15.2, -4.7)*  | -6.3 (-9.0, -3.5)*   |
| 22:6 n-3          | -6.8 (-10.6, -2.8)*   | -9.6 (-13.6, -5.5)*   | -4.5 (-9.2, 0.4)      | -3.6 (-6.1, -0.9)*   |
| <b>mol%</b>       |                       |                       |                       |                      |
| 14:0              | -14.2 (-18.0, -10.2)* | -14.1 (-18.2, -9.8)*  | -5.4 (-11.3, 1.0)     | -3.9 (-7.0, -0.7)*   |
| 16:0              | -20.1 (-23.7, -16.3)* | -20.7 (-24.5, -16.6)* | -14.4 (-19.8, -8.6)*  | -8.6 (-11.6, -5.6)*  |
| 18:0              | 3.9 (-0.7, 8.8)       | 3.9 (-0.9, 9.1)       | 2.0 (-4.8, 9.4)       | 0.9 (-2.5, 4.4)      |
| 20:0              | 9.8 (2.8, 17.4)*      | 10.6 (3.1, 18.5)*     | 8.8 (1.6, 16.4)*      | 3.8 (0.1, 7.7)       |
| 22:0              | 4.4 (-0.5, 9.5)       | 4.5 (-0.1, 9.4)       | 11.6 (5.7, 17.9)*     | 5.7 (3.0, 8.5)*      |
| 18:1 n-9          | 14.6 (9.1, 20.3)*     | 15.3 (9.1, 21.9)*     | 5.4 (-0.8, 12.1)      | 4.4 (1.2, 7.6)*      |
| 20:1 n-9          | 7.4 (1.9, 13.1)*      | 9.1 (3.8, 14.8)*      | 2.8 (-4.3, 10.4)      | 2.3 (-1.6, 6.3)      |
| 22:1 n-9          | 10.0 (4.4, 15.8)*     | 12.2 (6.3, 18.3)*     | 6.1 (-1.0, 13.7)      | 4.0 (0.4, 7.7)*      |
| 24:1 n-9          | 3.4 (-1.2, 8.3)       | 1.6 (-3.1, 6.6)       | 10.6 (4.1, 17.5)*     | 4.9 (1.7, 8.2)*      |
| 14:1 n-7          | -10.2 (-14.4, -5.7)*  | -9.9 (-14.4, -5.2)*   | -4.4 (-10.3, 1.8)     | -2.8 (-5.9, 0.4)     |
| 16:1 n-7          | -10.8 (-15.2, -6.2)*  | -11.0 (-15.6, -6.2)*  | -9.1 (-14.9, -2.9)*   | -5.2 (-8.2, -2.0)*   |
| 18:1 n-7          | 7.0 (1.5, 12.7)*      | 7.2 (1.6, 13.1)*      | 5.0 (-1.5, 11.9)      | 3.7 (0.4, 7.0)*      |
| 18:2 n-6          | 12.8 (6.9, 19.0)*     | 13.7 (7.5, 20.3)*     | 11.4 (4.6, 18.7)*     | 5.9 (2.5, 9.4)*      |
| 18:3 n-6          | 8.9 (4.2, 13.8)*      | 11.1 (6.2, 16.2)*     | 9.1 (2.7, 16.0)*      | 4.9 (1.8, 8.1)*      |
| 20:2 n-6          | 21.6 (16.3, 27.1)*    | 22.6 (16.9, 28.6)*    | 11.3 (4.5, 18.7)*     | 7.7 (4.4, 11.2)*     |

|          |                   |                   |                  |                 |
|----------|-------------------|-------------------|------------------|-----------------|
| 20:3 n-6 | 4.3 (-0.1, 9.0)   | 4.1 (-0.6, 9.0)   | 2.9 (-2.2, 8.2)  | 1.3 (-1.3, 4.0) |
| 20:4 n-6 | 10.1 (5.0, 15.4)* | 9.3 (3.4, 15.6)*  | 4.8 (-1.4, 11.4) | 3.0 (-0.1, 6.1) |
| 22:4 n-6 | 1.8 (-2.8, 6.7)   | 2.2 (-2.4, 7.0)   | 7.9 (1.3, 14.9)* | 4.3 (1.3, 7.4)* |
| 18:3 n-3 | 5.5 (0.4, 10.9)*  | 5.4 (-0.3, 11.4)  | 5.5 (-1.8, 13.2) | 2.4 (-1.2, 6.1) |
| 20:5 n-3 | 8.2 (1.7, 15.1)*  | 4.9 (-1.8, 12.0)  | 7.3 (1.6, 13.3)* | 2.8 (-0.1, 5.8) |
| 22:5 n-3 | 12.9 (7.3, 18.8)* | 12.6 (6.3, 19.2)* | 4.2 (-2.0, 10.9) | 2.2 (-1.0, 5.5) |
| 22:6 n-3 | 5.4 (0.1, 11.0)   | 2.3 (-3.0, 7.8)   | 5.3 (0.2, 10.7)  | 1.9 (-0.8, 4.7) |

---

Supplemental Table S4: Raw estimates and confidence interval values for *fully*-adjusted GEE models of the association of the TGFA (mol% and nmol/mL) and total clinically-measured TG with insulin sensitivity and beta-cell function outcomes using the 6 year longitudinal data from the PROMISE cohort. Variables controlled for were follow-up time, WC, baseline age, ethnicity, sex, ALT, physical activity, and total NEFA. Estimates represent a percent difference in the outcome per SD increase in the FA. P-values were adjusted for the BH false discovery rate, with an asterisk (\*) denoting a significant (p<0.05) association.

| <b>Fatty acid</b> | <b>log(HOMA2-%S)</b> | <b>log(ISI)</b>       | <b>log(IGI/IR)</b>  | <b>log(ISSI-2)</b> |
|-------------------|----------------------|-----------------------|---------------------|--------------------|
| <b>Totals</b>     |                      |                       |                     |                    |
| Clinical TAG      | -13.8 (-18.1, -9.3)* | -14.8 (-19.3, -10.1)* | -9.3 (-15.3, -2.9)* | -4.9 (-8.3, -1.4)* |
| Total TAG         | -13.1 (-17.3, -8.7)* | -14.3 (-18.7, -9.6)*  | -7.9 (-13.5, -1.9)* | -4.3 (-7.5, -1.1)* |
| <b>nmol/mL</b>    |                      |                       |                     |                    |
| 14:0              | -11.2 (-14.8, -7.4)* | -12.3 (-16.2, -8.3)*  | -4.8 (-9.9, 0.6)    | -2.8 (-5.5, 0.0)   |
| 16:0              | -13.5 (-17.6, -9.1)* | -14.8 (-19.2, -10.2)* | -8.4 (-14.1, -2.4)* | -4.6 (-7.7, -1.3)* |
| 18:0              | -12.1 (-16.2, -7.7)* | -13.1 (-17.7, -8.3)*  | -8.3 (-14.0, -2.2)* | -4.6 (-7.7, -1.4)* |
| 20:0              | -6.3 (-9.7, -2.7)*   | -6.6 (-10.7, -2.2)*   | -4.0 (-9.4, 1.7)    | -3.0 (-5.7, -0.2)  |
| 22:0              | -7.8 (-11.6, -3.9)*  | -8.0 (-12.3, -3.6)*   | -1.2 (-6.7, 4.6)    | -1.3 (-3.8, 1.4)   |
| 18:1 n-9          | -12.4 (-16.3, -8.4)* | -13.6 (-17.8, -9.2)*  | -7.9 (-13.4, -2.1)* | -4.2 (-7.2, -1.1)* |
| 20:1 n-9          | -7.3 (-10.5, -3.9)*  | -7.3 (-11.0, -3.5)*   | -6.3 (-11.8, -0.4)  | -2.9 (-5.7, 0.1)   |
| 22:1 n-9          | -6.3 (-10.1, -2.3)*  | -5.0 (-9.6, -0.2)     | -4.9 (-9.7, 0.1)    | -1.8 (-4.1, 0.7)   |
| 24:1 n-9          | -3.2 (-6.2, -0.1)    | -4.5 (-7.9, -0.9)*    | 1.0 (-4.0, 6.2)     | 0.5 (-1.9, 3.0)    |
| 14:1 n-7          | -8.1 (-11.5, -4.6)*  | -9.1 (-12.8, -5.4)*   | -3.7 (-8.7, 1.6)    | -1.9 (-4.4, 0.7)   |
| 16:1 n-7          | -10.1 (-13.9, -6.1)* | -11.2 (-15.3, -7.0)*  | -6.1 (-11.7, -0.1)  | -2.9 (-5.8, 0.1)   |
| 18:1 n-7          | -12.2 (-16.0, -8.1)* | -13.2 (-17.6, -8.6)*  | -6.3 (-12.0, -0.2)  | -3.0 (-6.0, 0.0)   |
| 18:2 n-6          | -11.6 (-15.5, -7.6)* | -12.3 (-16.3, -8.0)*  | -6.0 (-11.4, -0.4)  | -3.8 (-6.7, -0.7)* |
| 18:3 n-6          | -7.7 (-11.4, -3.8)*  | -8.2 (-12.4, -3.8)*   | -4.8 (-9.8, 0.5)    | -2.7 (-5.5, 0.2)   |
| 20:2 n-6          | -7.6 (-11.4, -3.6)*  | -8.3 (-12.4, -4.0)*   | -4.6 (-9.7, 0.7)    | -2.0 (-4.8, 0.9)   |
| 20:3 n-6          | -9.1 (-12.8, -5.3)*  | -10.2 (-14.1, -6.2)*  | -4.4 (-9.3, 0.7)    | -2.6 (-5.3, 0.2)   |
| 20:4 n-6          | -8.8 (-13.5, -3.9)*  | -10.1 (-15.1, -4.8)*  | -5.6 (-11.2, 0.3)   | -3.0 (-6.3, 0.5)   |
| 22:4 n-6          | -9.2 (-13.9, -4.2)*  | -10.0 (-14.8, -4.9)*  | -3.3 (-8.3, 2.1)    | -1.7 (-4.5, 1.3)   |
| 18:3 n-3          | -10.1 (-13.3, -6.9)* | -11.1 (-14.5, -7.5)*  | -6.0 (-10.9, -0.9)* | -3.7 (-6.1, -1.2)* |
| 20:5 n-3          | -2.6 (-5.8, 0.6)     | -5.4 (-8.8, -1.9)*    | -0.4 (-4.8, 4.2)    | -1.3 (-3.5, 1.0)   |
| 22:5 n-3          | -2.3 (-5.8, 1.5)     | -3.2 (-7.2, 1.1)      | -1.7 (-6.9, 3.8)    | -1.7 (-4.3, 0.8)   |
| 22:6 n-3          | -4.2 (-7.6, -0.6)*   | -6.8 (-10.4, -3.1)*   | -0.3 (-4.4, 4.1)    | -1.3 (-3.5, 0.8)   |
| <b>mol%</b>       |                      |                       |                     |                    |
| 14:0              | -9.6 (-12.7, -6.4)*  | -10.2 (-13.7, -6.6)*  | -2.7 (-8.1, 3.0)    | -2.1 (-4.7, 0.7)   |
| 16:0              | -11.9 (-15.0, -8.6)* | -12.8 (-16.4, -9.2)*  | -7.1 (-12.2, -1.8)* | -3.9 (-6.5, -1.3)* |
| 18:0              | 2.5 (-1.1, 6.3)      | 2.1 (-1.8, 6.1)       | -1.6 (-7.5, 4.8)    | -1.2 (-4.0, 1.7)   |
| 20:0              | 6.6 (2.1, 11.2)*     | 6.8 (1.9, 12.0)*      | 3.2 (-2.6, 9.3)     | 0.9 (-2.2, 4.0)    |
| 22:0              | 1.3 (-2.0, 4.7)      | 2.0 (-1.5, 5.5)       | 4.3 (-1.9, 10.8)    | 1.6 (-1.0, 4.3)    |
| 18:1 n-9          | 8.8 (4.7, 13.1)*     | 9.3 (4.4, 14.4)*      | 3.9 (-1.7, 9.8)     | 3.2 (0.5, 6.0)*    |
| 20:1 n-9          | 5.9 (1.9, 10.1)*     | 6.9 (2.1, 12.0)*      | 2.2 (-4.4, 9.2)     | 1.9 (-1.9, 5.9)    |
| 22:1 n-9          | 6.9 (3.0, 10.9)*     | 8.7 (4.3, 13.3)*      | 3.9 (-2.1, 10.4)    | 2.7 (-0.2, 5.7)    |
| 24:1 n-9          | 0.8 (-2.8, 4.5)      | 0.3 (-3.7, 4.4)       | 3.9 (-2.1, 10.2)    | 1.2 (-1.6, 4.1)    |
| 14:1 n-7          | -6.6 (-9.9, -3.2)*   | -7.1 (-10.7, -3.3)*   | -1.6 (-6.8, 4.0)    | -0.9 (-3.5, 1.8)   |
| 16:1 n-7          | -6.1 (-9.5, -2.6)*   | -6.4 (-10.2, -2.5)*   | -2.2 (-8.0, 4.0)    | -0.9 (-3.7, 2.0)   |
| 18:1 n-7          | 7.2 (3.1, 11.4)*     | 8.1 (3.5, 12.8)*      | 9.0 (2.9, 15.4)*    | 5.7 (2.9, 8.6)*    |
| 18:2 n-6          | 5.8 (1.5, 10.3)*     | 7.5 (2.7, 12.6)*      | 3.2 (-2.4, 9.0)     | 1.1 (-1.5, 3.8)    |

|          |                    |                    |                  |                  |
|----------|--------------------|--------------------|------------------|------------------|
| 18:3 n-6 | 3.4 (-0.7, 7.6)    | 4.7 (0.2, 9.5)     | 2.1 (-3.6, 8.1)  | 1.1 (-1.7, 3.9)  |
| 20:2 n-6 | 14.4 (10.4, 18.6)* | 15.9 (11.2, 20.7)* | 6.9 (0.9, 13.1)* | 5.0 (2.1, 7.9)*  |
| 20:3 n-6 | 4.3 (0.7, 8.0)*    | 4.2 (0.2, 8.3)     | 2.6 (-2.0, 7.4)  | 1.1 (-1.2, 3.5)  |
| 20:4 n-6 | 6.5 (2.5, 10.7)*   | 5.9 (1.1, 11.1)*   | 1.3 (-3.9, 6.8)  | 1.0 (-1.5, 3.6)  |
| 22:4 n-6 | 2.4 (-1.1, 6.0)    | 2.9 (-0.8, 6.8)    | 4.2 (-1.7, 10.4) | 2.4 (-0.2, 5.0)  |
| 18:3 n-3 | 1.0 (-2.7, 4.7)    | 1.5 (-2.7, 5.8)    | 0.3 (-5.4, 6.3)  | -0.6 (-3.3, 2.1) |
| 20:5 n-3 | 4.2 (-0.1, 8.6)    | 1.3 (-3.4, 6.3)    | 3.8 (-0.5, 8.2)  | 0.8 (-1.4, 3.0)  |
| 22:5 n-3 | 8.7 (4.7, 12.8)*   | 7.9 (3.1, 13.0)*   | 4.3 (-0.7, 9.5)  | 1.7 (-0.8, 4.4)  |
| 22:6 n-3 | 2.4 (-1.1, 6.0)    | -0.2 (-4.0, 3.8)   | 3.3 (-0.7, 7.5)  | 0.6 (-1.6, 2.7)  |

---

**Supplemental Figures**

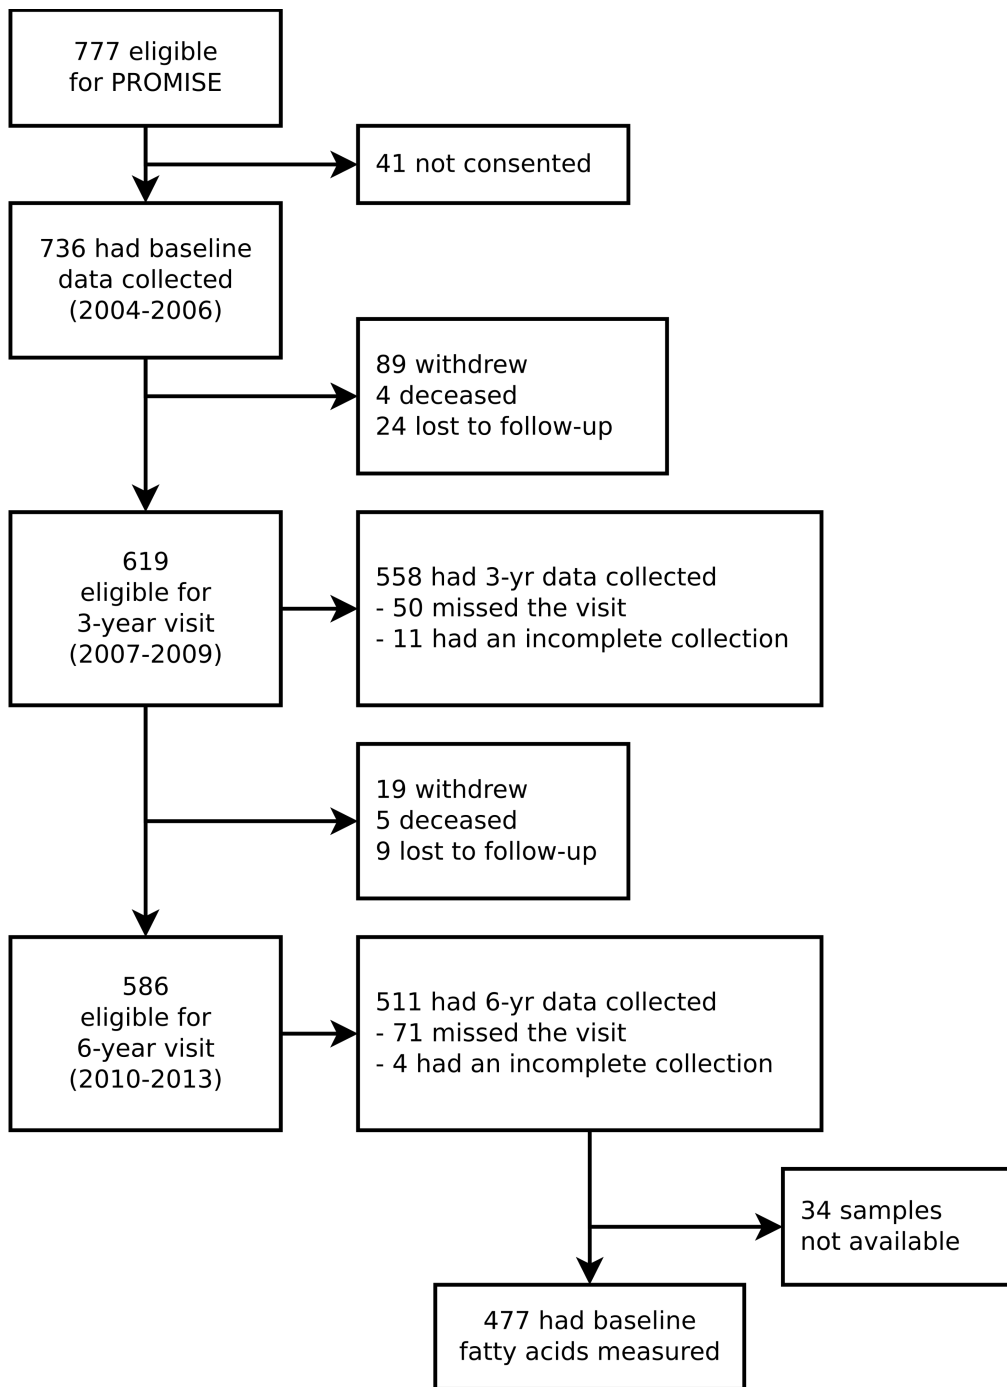

Supplemental Figure S1: CONSORT diagram of PROMISE participants over the 3 visits.

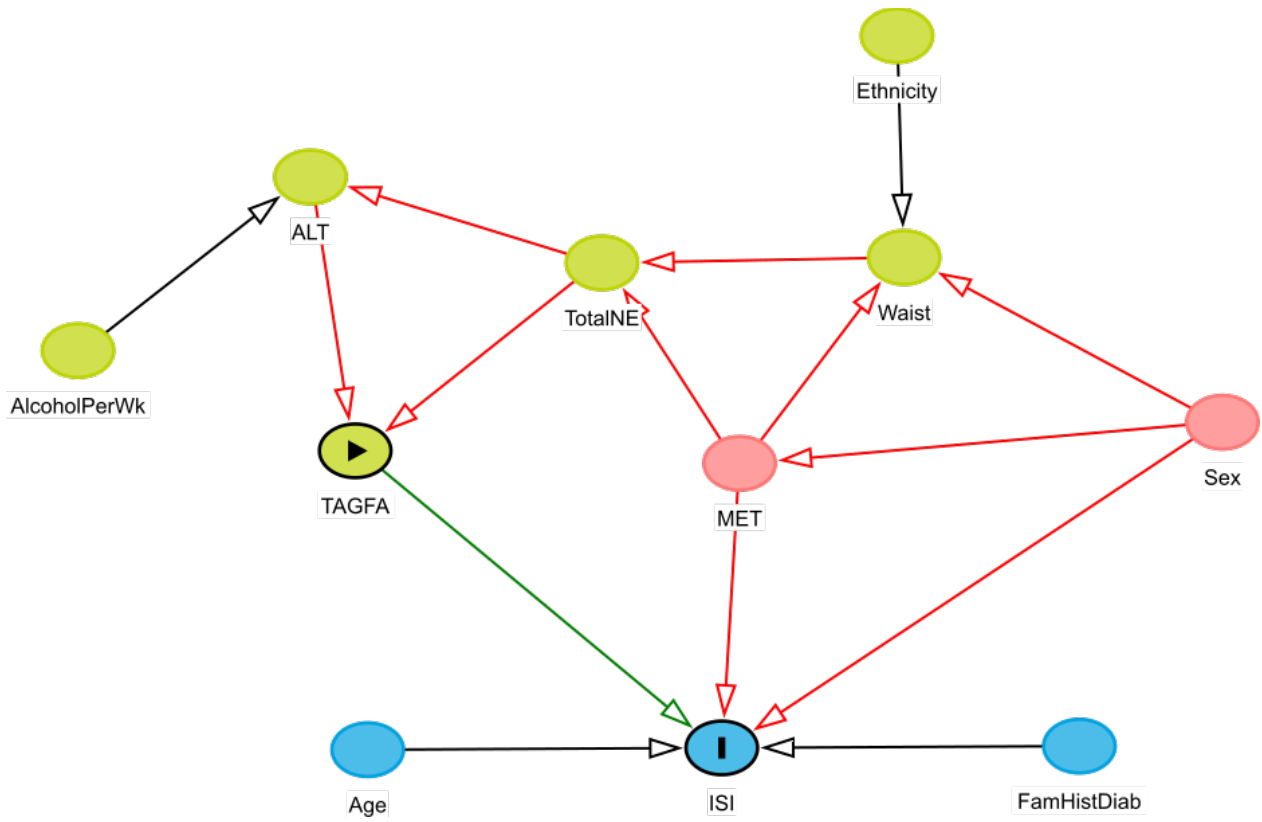

Supplemental Figure S2: Directed acyclic graphic output from the DAGitty online software for insulin sensitivity.



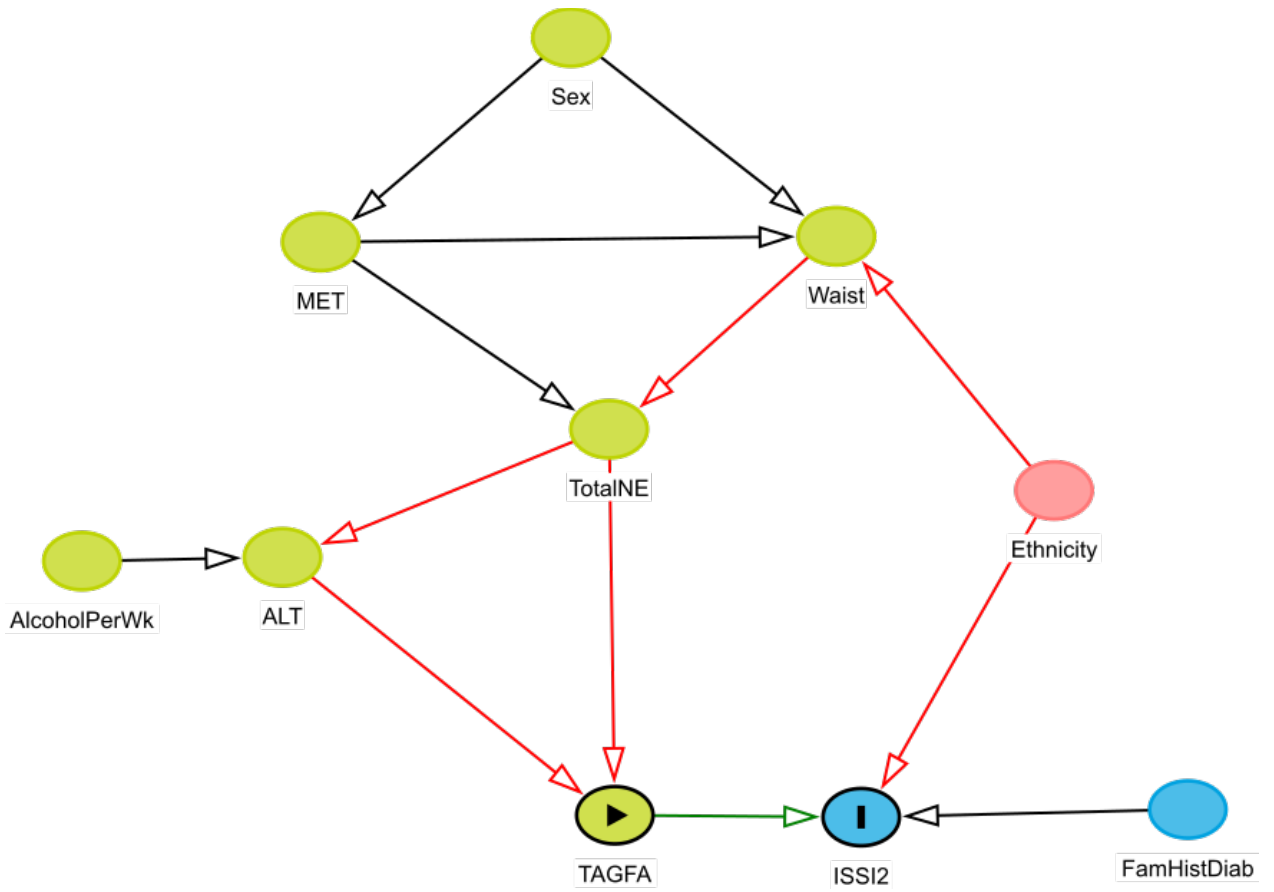

Supplemental Figure S3: Directed acyclic graph output from the DAGitty online software for beta-cell function.

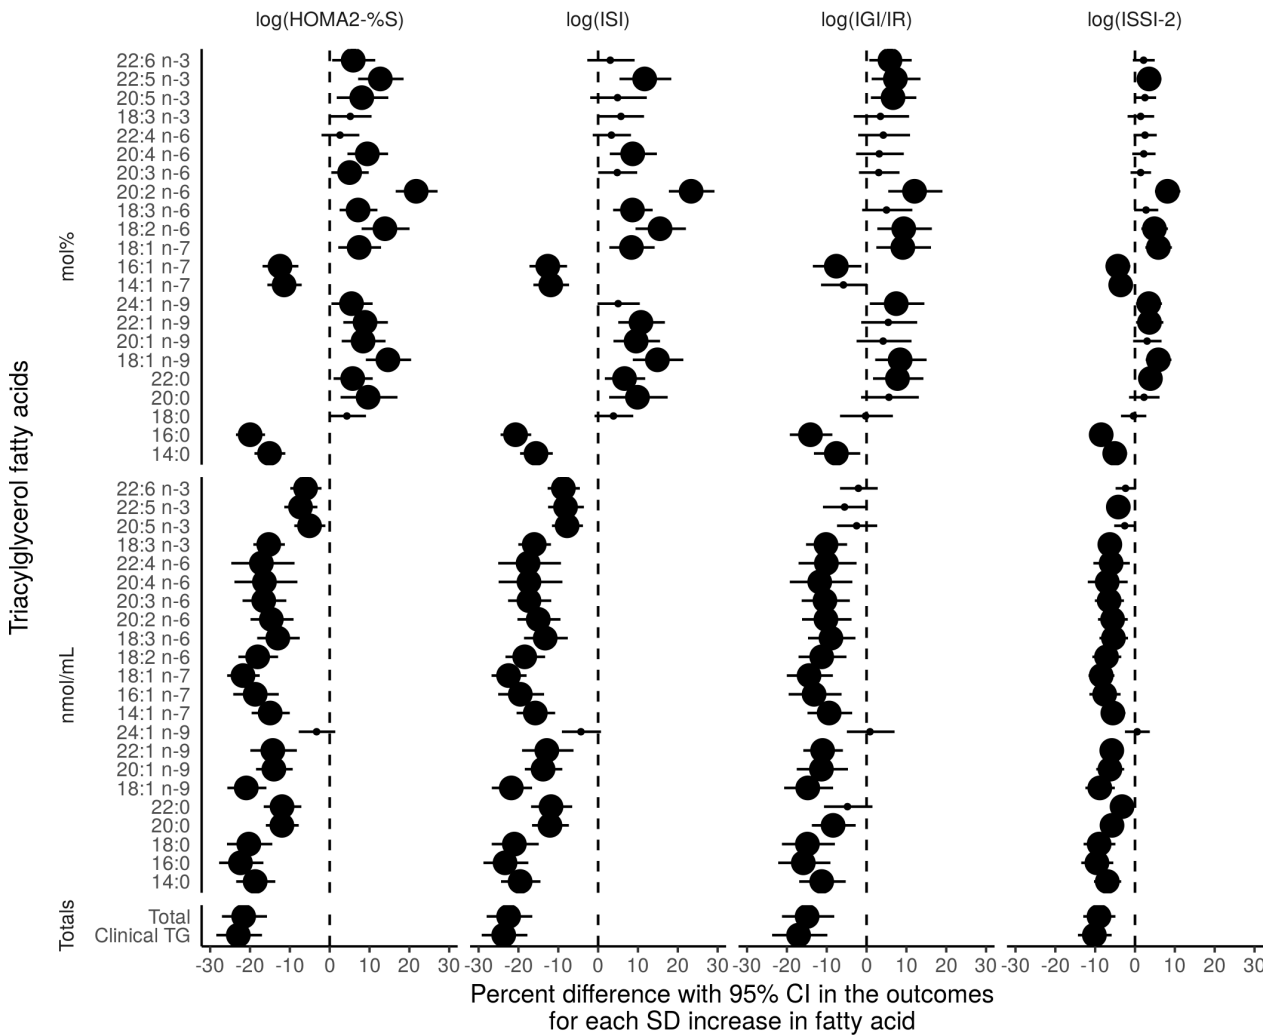

Supplemental Figure S4: Fully-adjusted (without waist size) GEE models of the association of the TGFA (mol% and nmol/mL) and total clinically-measured TG with insulin sensitivity and beta-cell function outcomes using the 6 year longitudinal data from the PROMISE cohort. Variables controlled for were follow-up time, baseline age, ethnicity, sex, ALT, physical activity, and total NEFA. X-axis values represent a percent difference in the outcome per SD increase in the FA. P-values were adjusted for the BH false discovery rate, with the largest dot representing a significant ( $p < 0.05$ ) association.

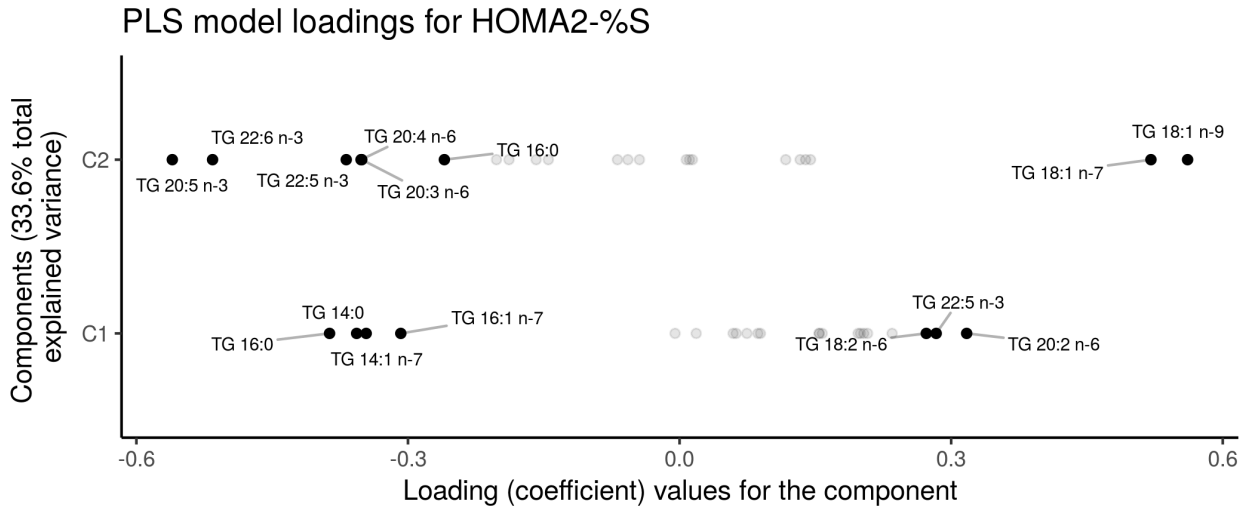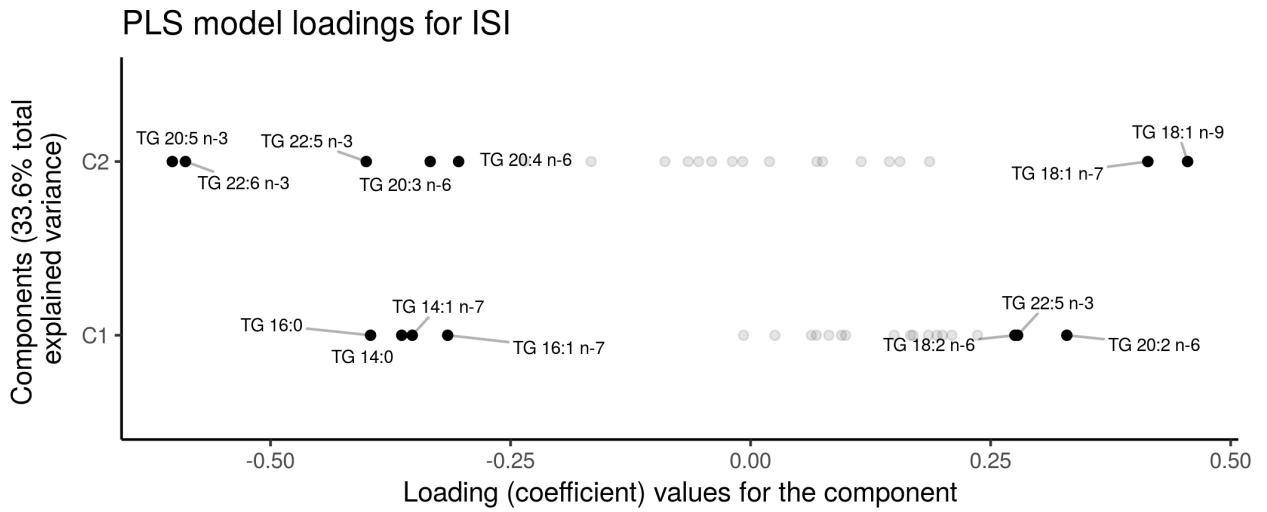

Supplemental Figure S5: PLS loadings (or weights) for each of the TGFA. A larger loading indicates a higher contribution to the PLS component score.
